# Supplementary material for: The fecal metabolome is associated with gestational diabetes mellitus
Source: Royal Society of Chemistry journal article supplement (doi:10.1039/c9ra05569j), 2019-01-01
Supplement: c9ra05569j1.pdf [file c9ra05569j1.pdf]

- 1 **Figure S1. The distribution of the input metabolomic data values before (left)**
- 2 **and after (right) normalization.** The input metabolomic data was normalized by
- 3 sum peak area, transformed with log transformation, and scaled with Pareto scaling.

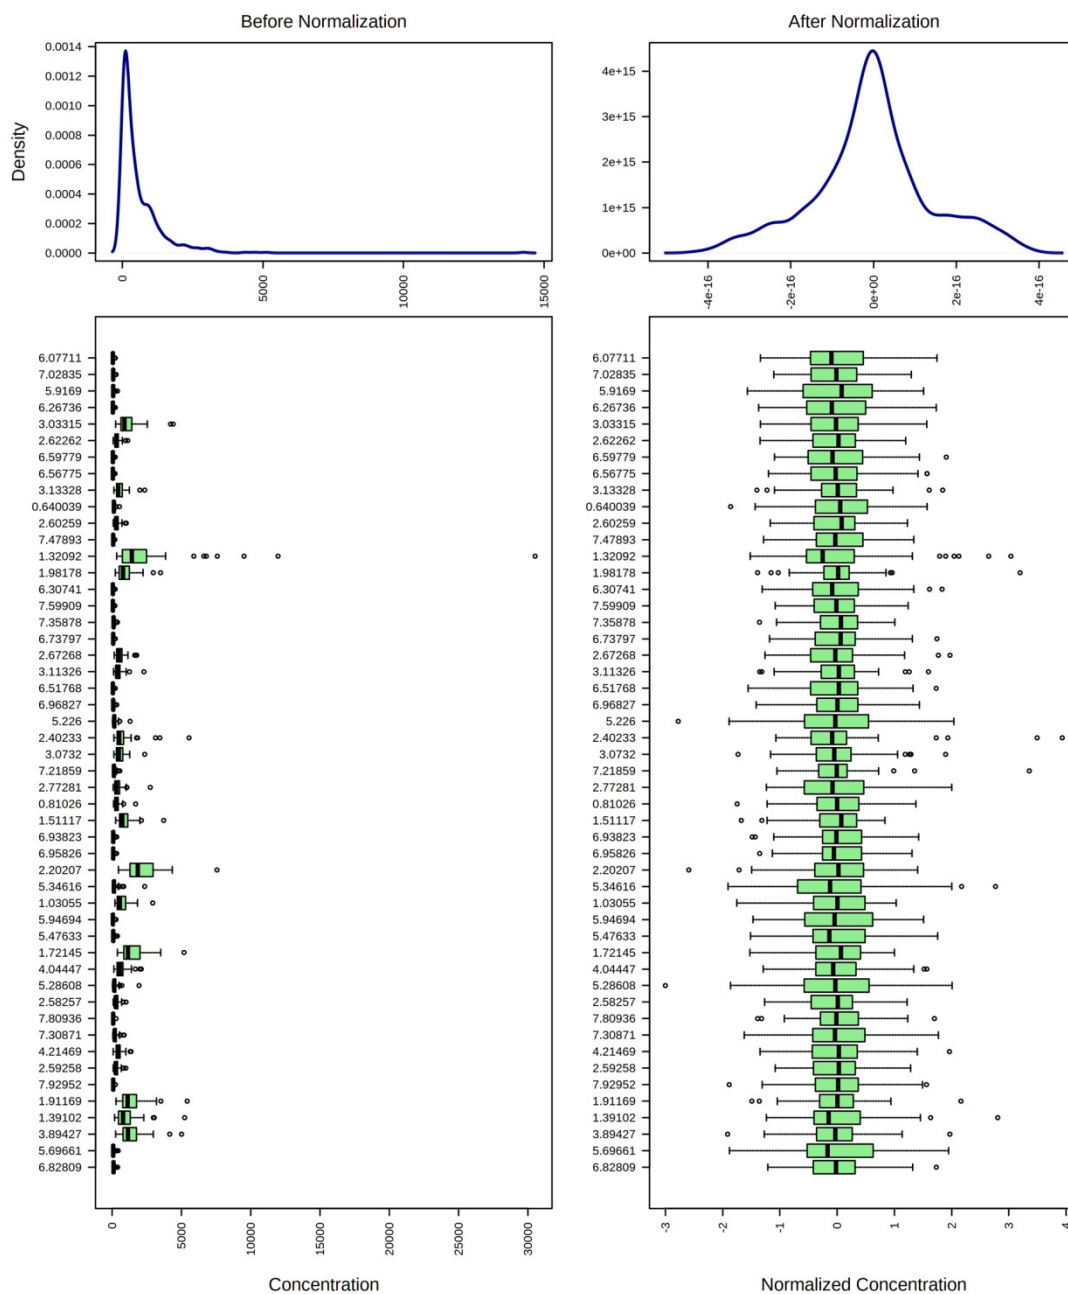

4

5

6

7

8

9

10

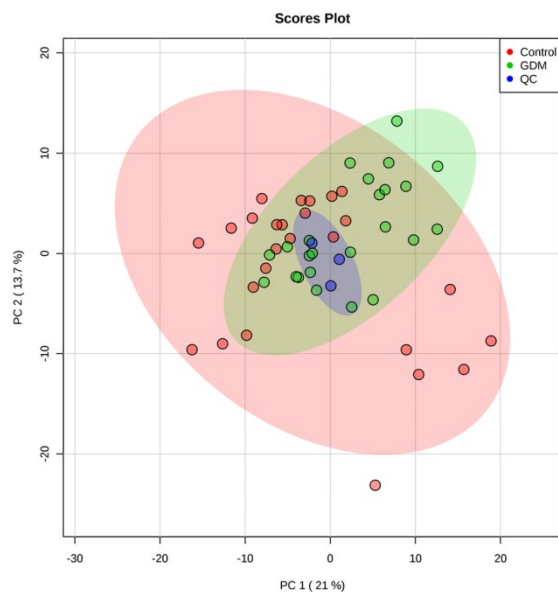

11

12

13

14 **Figure S2. PCA score plot based on the <sup>1</sup>H-NMR data of clinical samples and**  
15 **quality control samples.** Red oval represents the 95% CI of score calculated from the  
16 NDM control samples. Green oval represents the 95% CI of score calculated from the  
17 GDM samples. Purple oval represents the 95% CI of score calculated from the quality  
18 control samples.

19

20

21

22

23

24

25

26

27

28

29

30

31

32

33

34

35

36

37

38

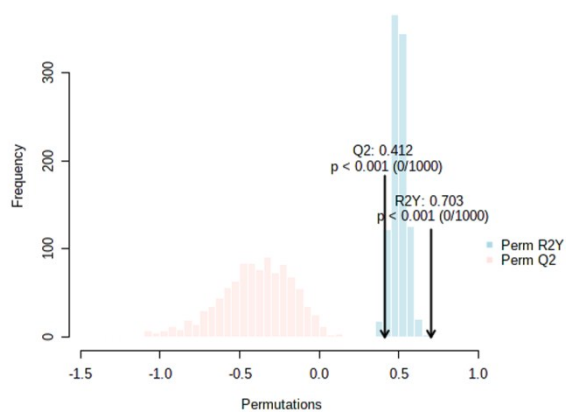

39 **Figure S3. Permutation tests of the OPLS-DA models.** R2Y represents multiple  
40 correlation coefficient. Q2 represents the cross-validated R2. Both of the parameters  
41 were used for assessment of the fitting validity and predictive ability of the OPLS-DA  
42 models.
